# Supplementary material
Source: PubMed Central journal article supplement (PMC4378104)
Supplement: ASN.2014010046_ASN2014010046SupplementaryData.pdf [file ASN.2014010046_ASN2014010046SupplementaryData.pdf]

Supplementary Table 1: Renal function at Baseline 6, 12 and 18 months:

| Mean (SE) e-GFR                                                 | Rituximab Group<br>(n=51) | CYC/AZA Group<br>(n=51) | P Value |
|-----------------------------------------------------------------|---------------------------|-------------------------|---------|
| <b>e-GFR by MDRD</b>                                            |                           |                         |         |
| Baseline                                                        | 41.4 (3.26)               | 50.4 (3.27)             | 0.05    |
| 6 months                                                        | 43.8 (3.11)               | 52.6 (3.12)             | 0.05    |
| 12 months                                                       | 46.2 (3.17)               | 54.8 (3.17)             | 0.06    |
| 18 months                                                       | 48.7 (3.42)               | 57.0 (3.41)             | 0.09    |
| Comparison between 18 months and baseline, p-value <sup>1</sup> | 0.05                      | 0.05                    |         |
| Treatment difference over time, p-value                         |                           |                         | 0.83    |
| <b>e-GFR by Cockcroft-Gault</b>                                 |                           |                         |         |
| Baseline                                                        | 53.5 (4.64)               | 70.5 (4.65)             | 0.01    |
| 6 months                                                        | 57.1 (4.60)               | 73.7 (4.61)             | 0.01    |
| 12 months                                                       | 60.7 (4.79)               | 76.9 (4.80)             | 0.02    |
| 18 months                                                       | 64.2 (5.21)               | 80.1 (5.20)             | 0.03    |
| Comparison between 18 months and baseline, p-value <sup>1</sup> | 0.01                      | 0.02                    |         |
| Treatment difference over time, p-value                         |                           |                         | 0.80    |

## **The RAVE Research Group.**

### Co-Protocol Chairs

Ulrich Specks, M.D. (Mayo Clinic)

John H. Stone, M.D., M.P.H. (Massachusetts General Hospital)

### Mayo Clinic

Ulrich Specks, M.D.

Steven R. Ytterberg, M.D.

Fernando C. Fervenza, M.D.

Karina A. Keogh, M.B., B.Ch.

Tobias Peikert, M.D.

Jason M. Golbin, D.O.

Lorenzo Klein, M.D.

Kathleen Mieras, C.C.R.P.

Cynthia Beinhorn

Susan Fisher, R.N.

Mary Lou Clawson, R.N.

Sharon Bendel, R.N.

Amber M. Hummel

Mayo Clinic Eisenberg Research Pharmacy

### Boston University

Peter A. Merkel, M.D., M.P.H.\*\*\*\*

Eugene Y. Kissin, M.D.

Paul A. Monach, M.D., Ph.D.

Manuella R. Clark-Cotton, M.A.

Carol A. McAlear, M.S.

Jessica L. Pettit

Maureen B. Sutton, M.P.H.

Russell L. Widom, Ph.D.

Giuseppina A. Farina, M.D., Ph.D.

Michael J. DiMarzio

Sharlene P. Johnson, M.A.T.

### Johns Hopkins University

Philip Seo, M.D., M.H.S.

John H. Stone, M.D., M.P.H.

David Hellmann, M.D.

Duvuru Geetha, M.D.

Assil Saleh, M.D., M.P.H.

Peter Wung, M.D.

Lourdes P. Sejismundo, R.N., B.S.N.

Charlotte Humphrey, R.N., B.S.N.

Matthew Marriott, P.A.-C.

Yavette Goldsborough

Alexander Pinachos  
Karen Gauss, R.N., M.L.A.  
Linda King, R.N.

Cleveland Clinic Foundation

Carol A. Langford, M.D., M.H.S.  
Gary S. Hoffman, M.D.  
Rula A. Hajj-Ali, M.D.  
John J. Carey, M.D., M.S.  
Eamonn S. Molloy, M.D., M.S.  
Curry L. Koenig, M.D., M.S.  
Debora Bork, M.F.A.  
Tiffany M. Clark, M.S.N., C.N.P.  
Katherine A. Tuthill, M.S.N., C.N.P.  
Teresa Markle  
John Petrich, R.Ph., M.S.

Hospital for Special Surgery

Robert Spiera, M.D.  
Deborah R. Alpert, M.D., Ph.D.  
Stephen J. DiMartino, M.D., Ph.D.  
Jessica K. Gordon, M.D.  
Neal K. Moskowitz, M.D., Ph.D.  
Kyriakos A. Kirou, M.D.  
Jonathan Samuels, M.D.  
Stacey A. Kloiber, R.N.  
Elvedin Julevic  
Margaret O'Donohue, R.N.  
Avni Patel, Pharm.D.

University of Groningen

Cees Kallenberg, M.D., Ph.D.  
Coen Stegeman, M.D., Ph.D.  
Peter Rasker, R.N.  
Katinka Mulder  
Pieter Limburg, Ph.D.  
Jos Kosterink, Pharm.D.

Duke University

E. William St. Clair, M.D.  
Nancy B. Allen, M.D.  
Edna Scarlett, R.N.  
Martin Tochacek, Ph.D.

University of Alabama at Birmingham

Anthony Turkiewicz, M.D.

Barri J. Fessler, M.D.  
Winn Chatham, M.D.  
Anita Turner, R.N.

### **Coordinating Centers**

#### **Rho**

David Ikle, Ph.D.  
Alice Lail, M.S..  
Brett Jepson, M.S.  
Miguel Villarreal, M.S.

#### **PPD**

Wei Wu, Ph.D.  
Tammy D'Lugin  
Cathy Jacob

### **National Institute of Allergy and Infectious Diseases**

Lisa Viviano, R.N.\*  
Linna Ding, M.D., Ph.D.  
Steven Adah, Ph.D.  
James McNamara, M.D.

### **Immune Tolerance Network**

Nadia Tchao, M.D.  
Mark Mueller, B.S., C.C.R.P.\*\*  
Kasia Bourcier, Ph.D.\*\*  
Deborah J. Phippard, Ph.D.  
Adam L. Asare, Ph.D.  
Noha Lim, Ph.D.  
Peter Sayre, M.D.  
Vicki-Seyfert Margolis, Ph.D.\*\*\*  
Patti Tosta, R.N.  
Nancy B. Skeeter  
Claire L. Anderson  
Adelaide N. Archampong

\*Current employer: National Institutes of Heart, Lung and Blood Diseases.

\*\*Current employer: National Institutes of Allergy and Infectious Diseases.

\*\*\*Current employer: The U.S. Food and Drug Administration. The views presented in this article do not necessarily reflect those of the Food and Drug Administration.

\*\*\*\*Current employer: University of Pennsylvania, Philadelphia, PA.
